# Supplementary material for: Coevolution of Interorganizational Psychological Contract and Interorganizational Relationship: A Case Study of Manufacturing Company in China
Source: Hindawi journal article supplement (doi:10.1155/2017/9370969), 2017-01-01
Supplement: f1 [file 9370969.f1.zip]

Archive with 7 entries (4 files):
- supplementary material/
- supplementary material/Appendix A.docx
- __MACOSX/
- __MACOSX/supplementary material/
- __MACOSX/supplementary material/._Appendix A.docx
- supplementary material/Appendix B.docx
- __MACOSX/supplementary material/._Appendix B.docx
