# Supplementary material for: Coevolution of Interorganizational Psychological Contract and Interorganizational Relationship: A Case Study of Manufacturing Company in China
Source: Hindawi journal article supplement (doi:10.1155/2017/9370969), 2017-01-01
Supplement: f1 [file 9370969.f1.zip › supplementary material/Appendix A.docx]

**Coevolution of Interorganizational relationship and Interorganizational psychological contract Questionnaire**

**(English version)**

Dear Sir / Madam:

Hello!

First of all, thank you very much for taking the time to fill in this questionnaire!

We are doing a research project on "Coevolution of Interorganizational relationship and Interorganizational psychological contract". Through your answers to the following questions, it can help us in-depth study of interorganizational relationship and interorganizational psychological contract. We assure you: This survey results for research purposes only and strictly confidential. Please fill in your enterprise information according to the actual situation.

Thank you for your support and cooperation!

                                                    ---- Jiangxi University of Finance and Economics

**Questionnaire**

| According to the actual condition, please play “√” in the appropriate option. Fully in line with (the highest) of 5 points, the total not comply with (minimum) for 1 point and so on. | Greatly | To relatively large degree | To some degree | To a small degree | Not at all |
| --- | --- | --- | --- | --- | --- |
| **Transactional psychological contract** | | | | | |
| You expect the other party will conform to the terms in contract | 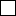 5 | 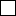 4 | 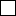3 | 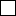 2 | 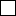 1 |
| You expect the other party will share the gains in terms of cost reduction and quality improvement | 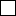 5 | 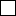 4 | 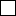3 | 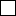 2 | 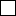 1 |
| You expect the other party will provide appropriate returns for the good quality products you provide | 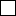 5 | 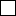 4 | 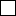3 | 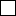 2 | 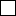 1 |
| You expect the other party can provide support to you | 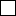 5 | 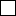 4 | 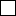3 | 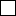 2 | 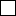 1 |
| **Relational psychological contract** | | | | | |
| You expect the other party will cooperate with you closely | 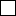 5 | 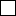 4 | 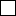3 | 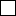 2 | 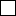 1 |
| You expect the other party will treat you honestly | 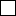 5 | 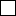 4 | 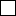3 | 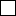 2 | 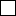 1 |
| You expect the other party can respond to your requirements | 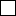 5 | 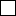 4 | 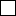3 | 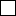 2 | 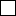 1 |
| You expect the other party can respect your relationship | 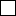 5 | 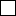 4 | 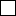3 | 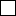 2 | 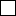 1 |
| **Relationship stock** | | | | | |
| The hardware can hardly be transferred to other partners | 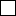 5 | 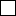 4 | 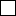3 | 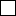 2 | 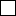 1 |
| The software can hardly be transferred to other partners | 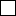 5 | 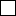 4 | 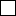3 | 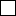 2 | 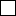 1 |
| **Relationship length** | | | | | |
| The cooperation relationship has lasted quite long time | 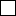 5 | 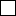 4 | 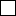3 | 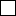 2 | 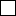 1 |
| You expect the future cooperation will last longer | 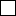 5 | 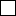 4 | 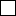3 | 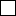 2 | 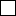 1 |
| **Relationship justice** | | | | | |
| The party appropriately allocate the gains based on each other’s contribution | 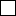 5 | 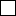 4 | 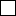3 | 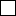 2 | 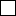 1 |
| The party equally exchange and negotiate in the cooperation process | 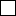 5 | 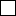 4 | 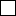3 | 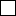 2 | 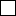 1 |
| **Trust** | | | | | |
| The party has always been evenhanded in its negotiations with us | 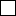 5 | 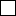 4 | 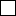3 | 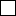 2 | 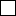 1 |
| The party may use opportunities that arise to profit at our expense a | 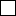 5 | 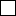 4 | 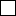3 | 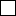 2 | 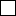 1 |
| Based on past experience, we cannot with complete confidence rely on the party to keep promises made to us a | 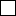 5 | 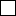 4 | 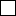3 | 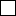 2 | 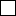 1 |
| We are hesitant to transact with the party when the specifications are vague a | 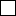 5 | 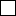 4 | 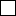3 | 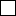 2 | 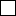 1 |
| The party is trustworthy | 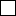 5 | 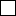 4 | 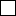3 | 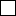 2 | 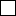 1 |

a reverse coded
