# Supplementary material for: Coevolution of Interorganizational Psychological Contract and Interorganizational Relationship: A Case Study of Manufacturing Company in China
Source: Hindawi journal article supplement (doi:10.1155/2017/9370969), 2017-01-01
Supplement: f1 [file 9370969.f1.zip › supplementary material/Appendix B.docx]

**Equations of the system dynamics model**

The variables in the relationship growth rate (RGR) rate variable in-tree branch satisfy the following relations:

RGR＝DELAY1(DC+DR+DE, 1 )-RS

DC=STEP(FC, 5)

DR=(CW+DD)*DT

DE=STEP(ARPCI, 5)

DD=STEP(ATPCI, 3)

CW=CS/10

CS=ARPCI+ATPCI

The variables in the increase of relationship length (IRL) rate variable in-tree branch satisfy the following relations:

IRL=FT*API*SC-RL

API=CW*10/OC

SC=STEP(ARPCI, 3)

OC=1+10*DD

The variables in the changes of relationship justice (CRJ) rate variable in-tree branch satisfy the following relations:

CRJ=DDJ+DPJ+DIJ-DRJ

DDJ=DELAY1(ATPCI, 1)

DPJ=DELAY1(ARPCI, 1)

DIJ=DELAY1(LOG(FC*ARPCI, 2 ),1)

The variables in the changes of transactional psychological contract implemented (CTPCI) rate variable in-tree branch satisfy the following relations:

CTPCI=EC*DCD-ATPCI

DCD=100/(RS+RL+RJ)

The variables in the amount of changes of relational psychological contract implemented (ACRPCI) rate variable in-tree branch satisfy the following relations:

CRPCI=CF*DR-ARPCI

DR=(RS+RL+RJ)*MDEV
